# Supplementary material
Source: PubMed Central journal article supplement (PMC8819510)

**Supplemental Figure 1. Ambulatory Glucose Profiles in Pilot Study Participants without Diabetes**

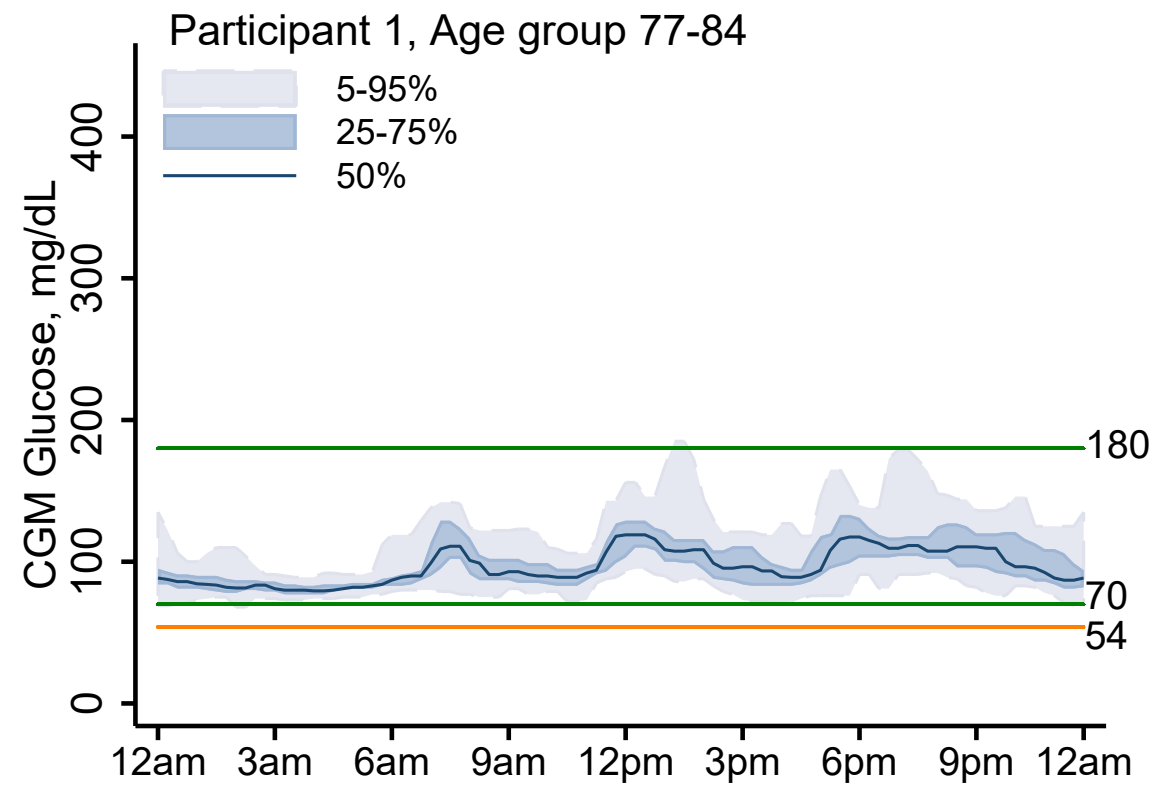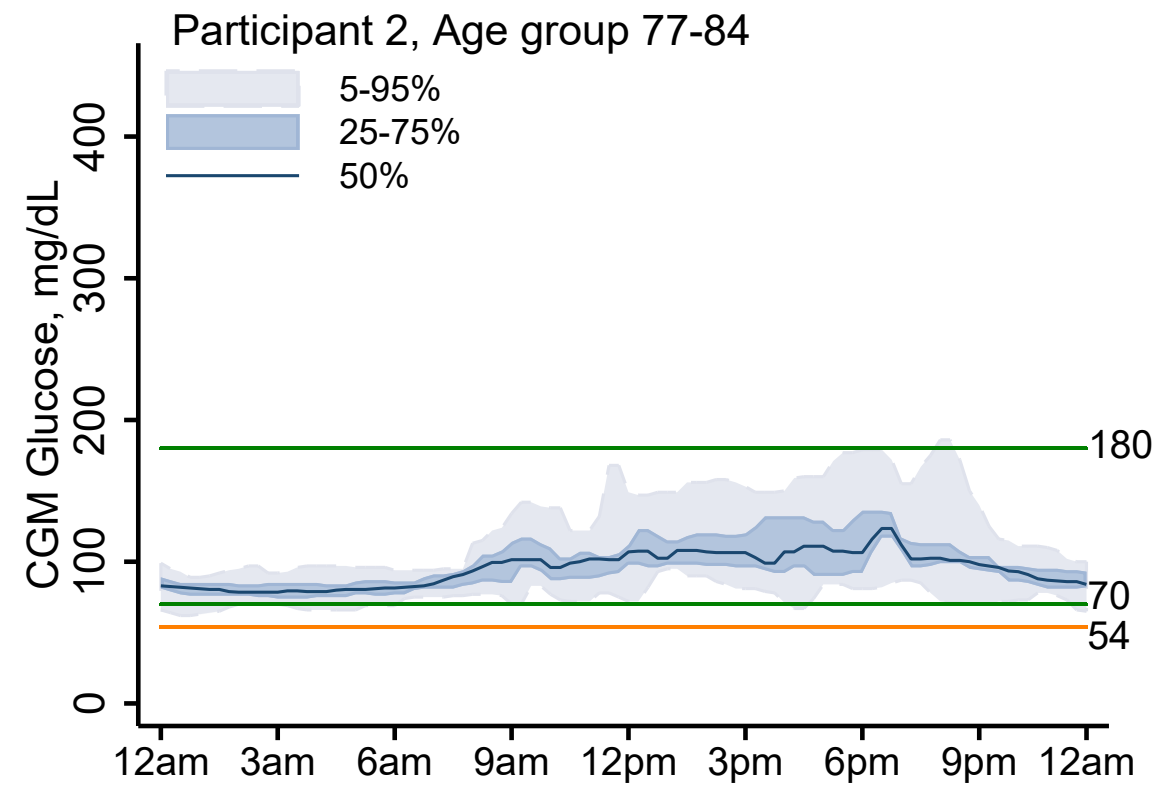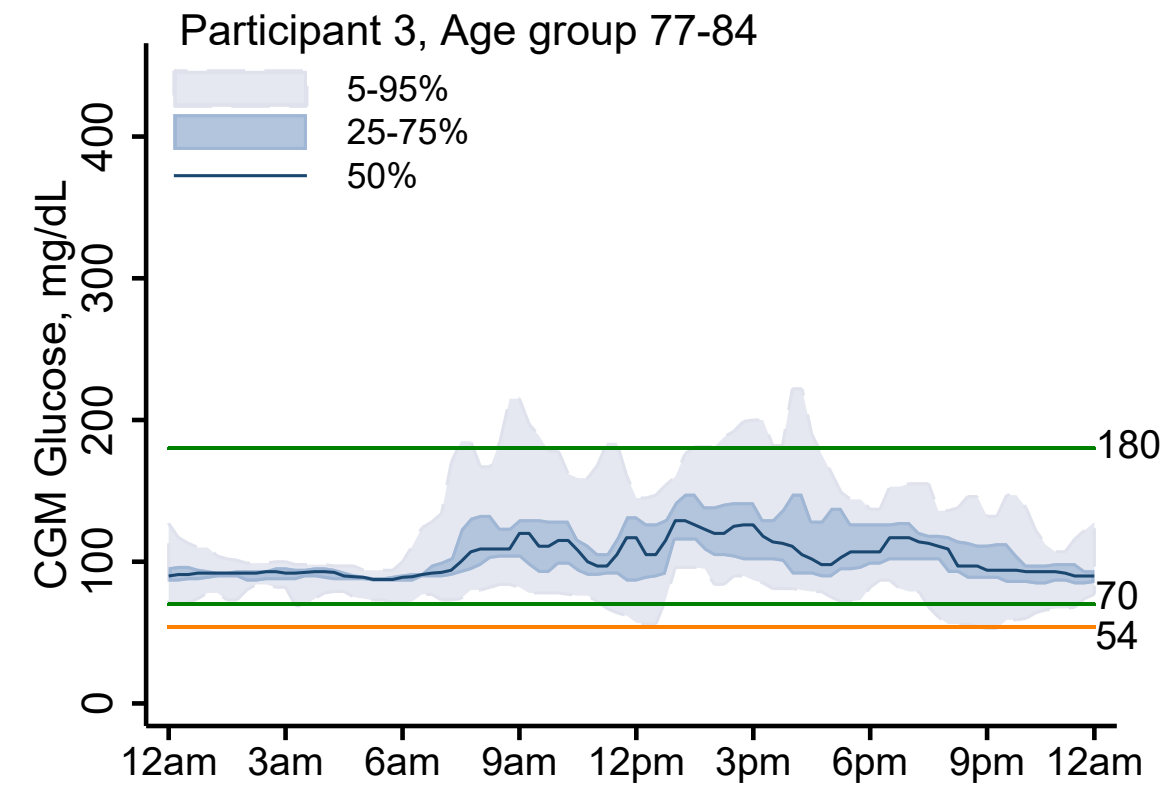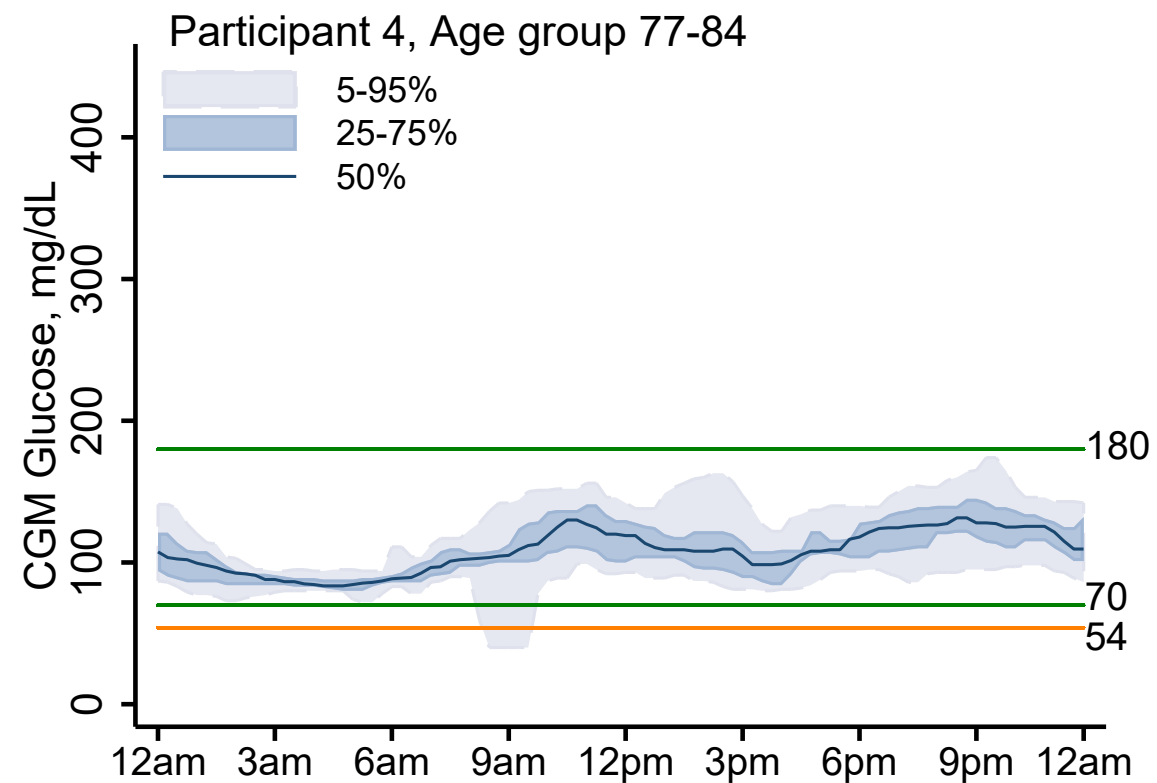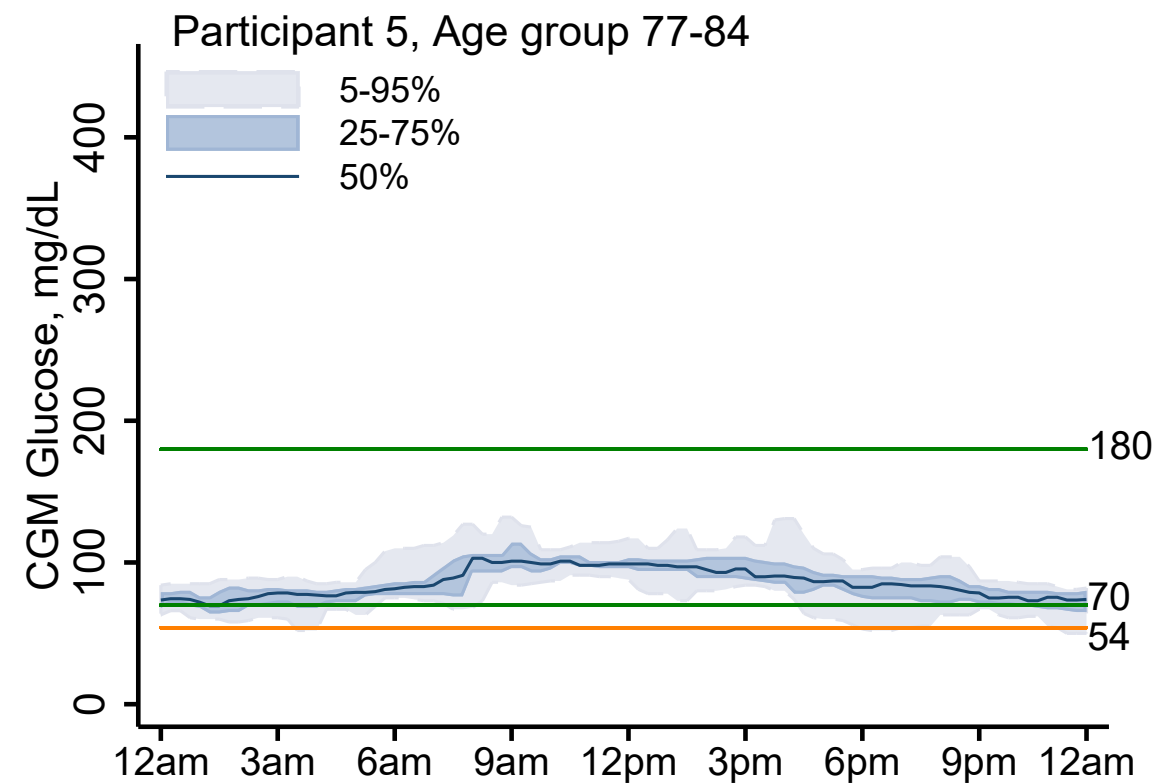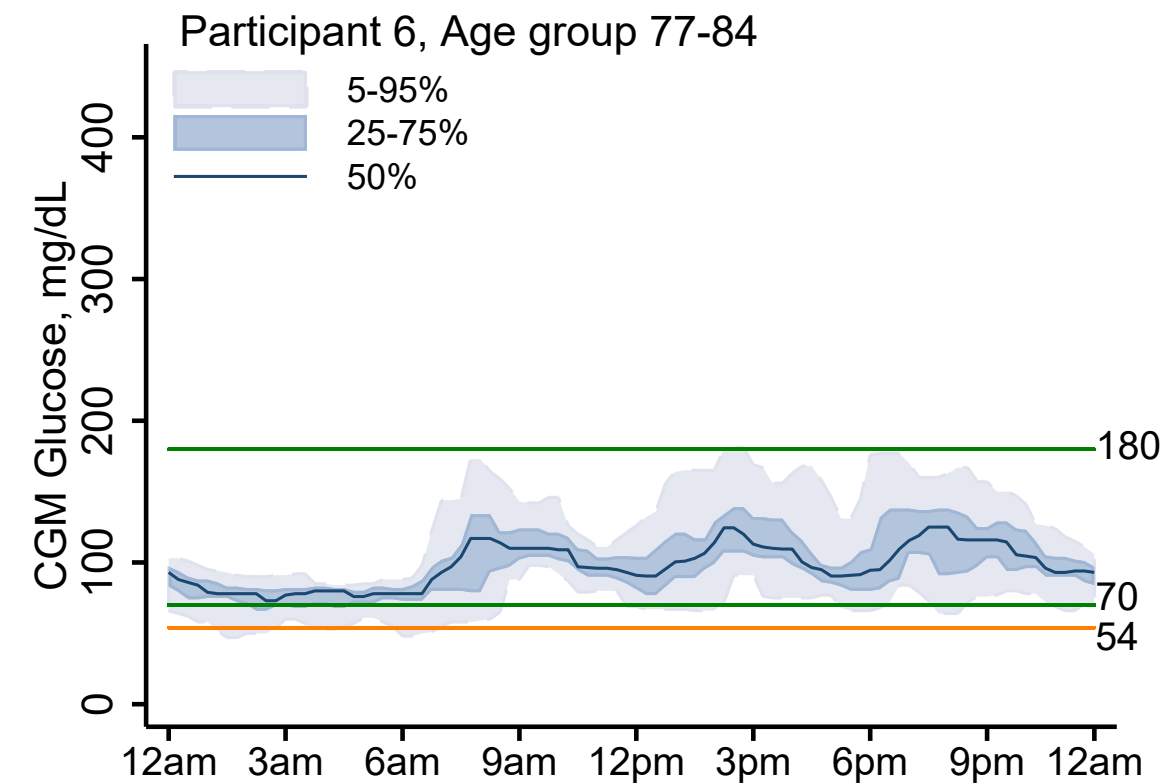

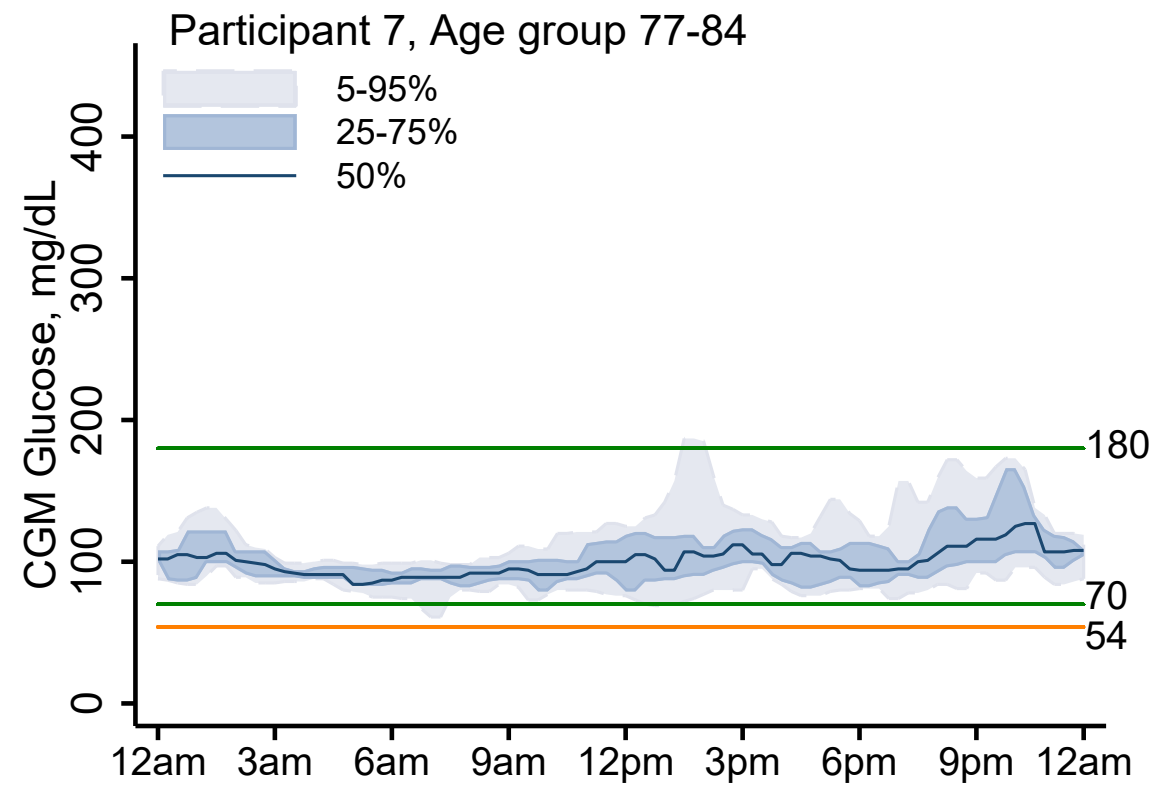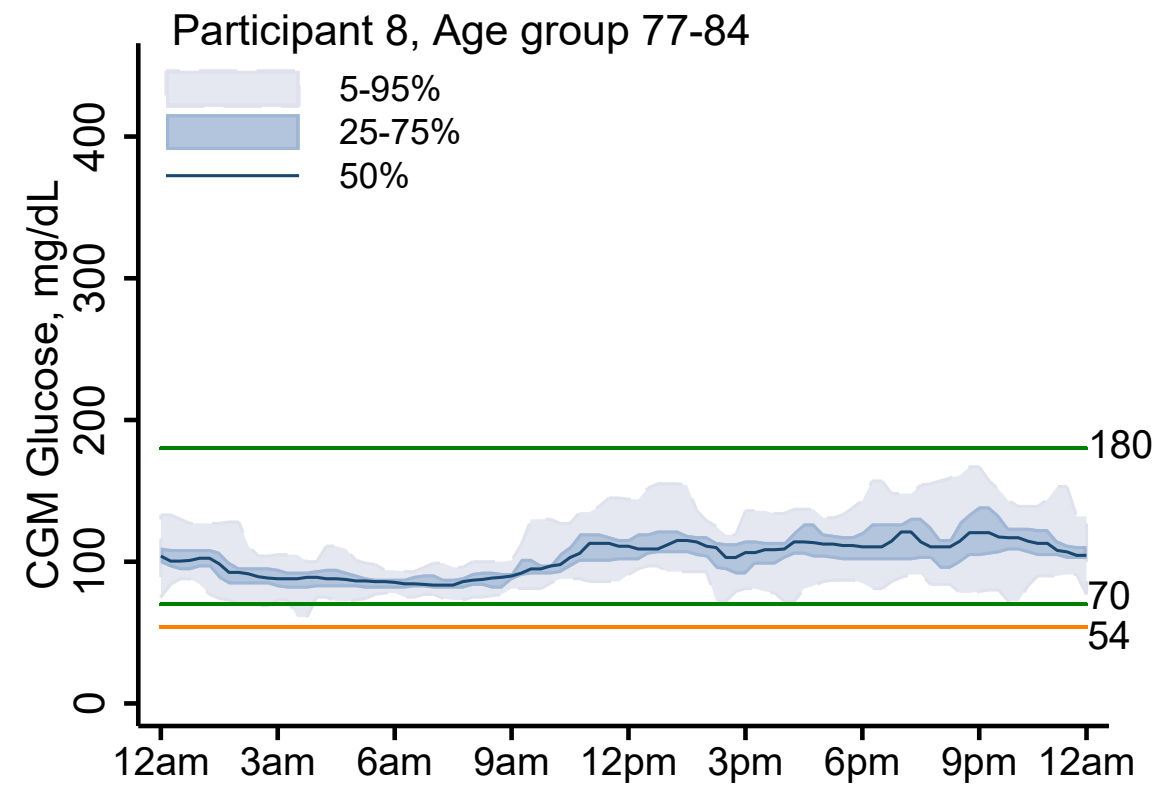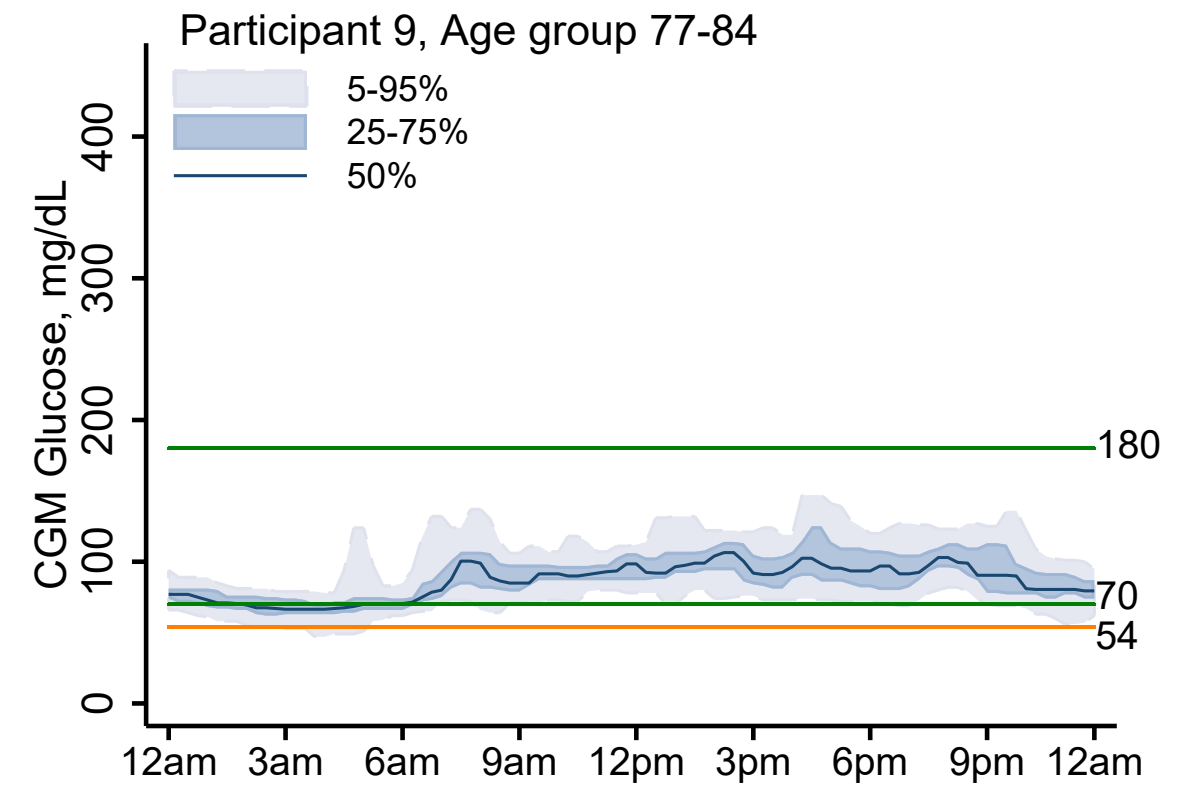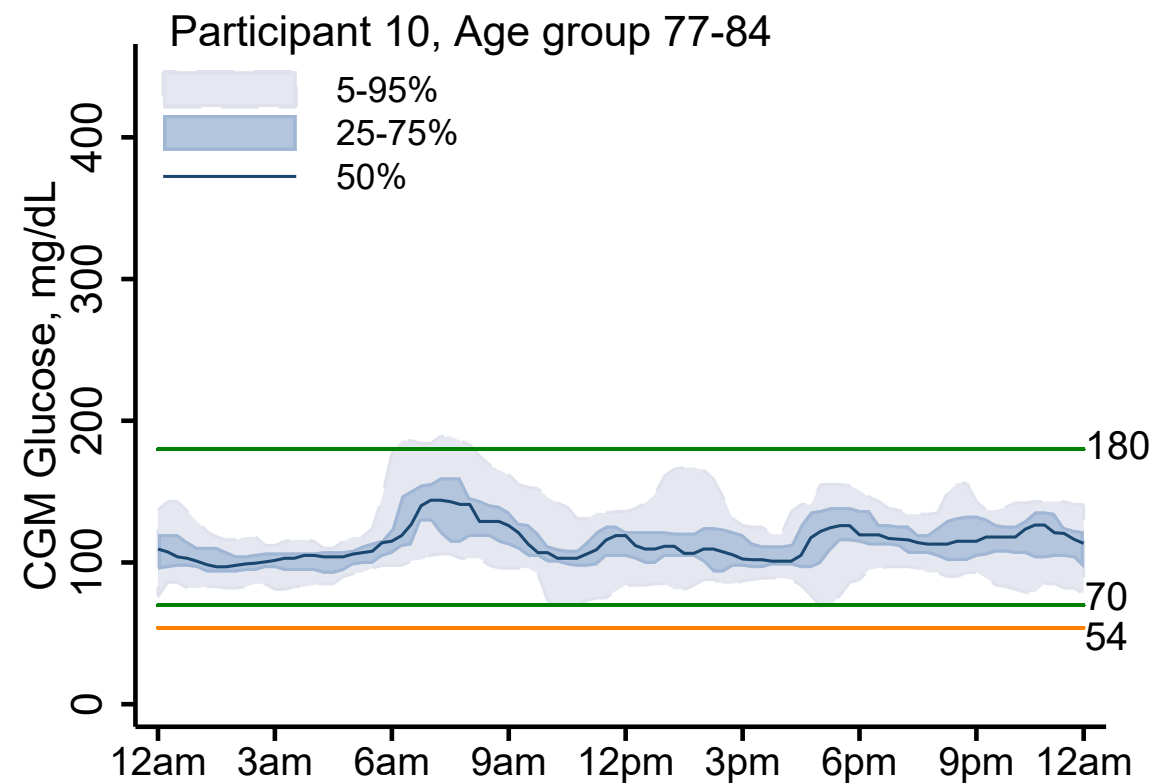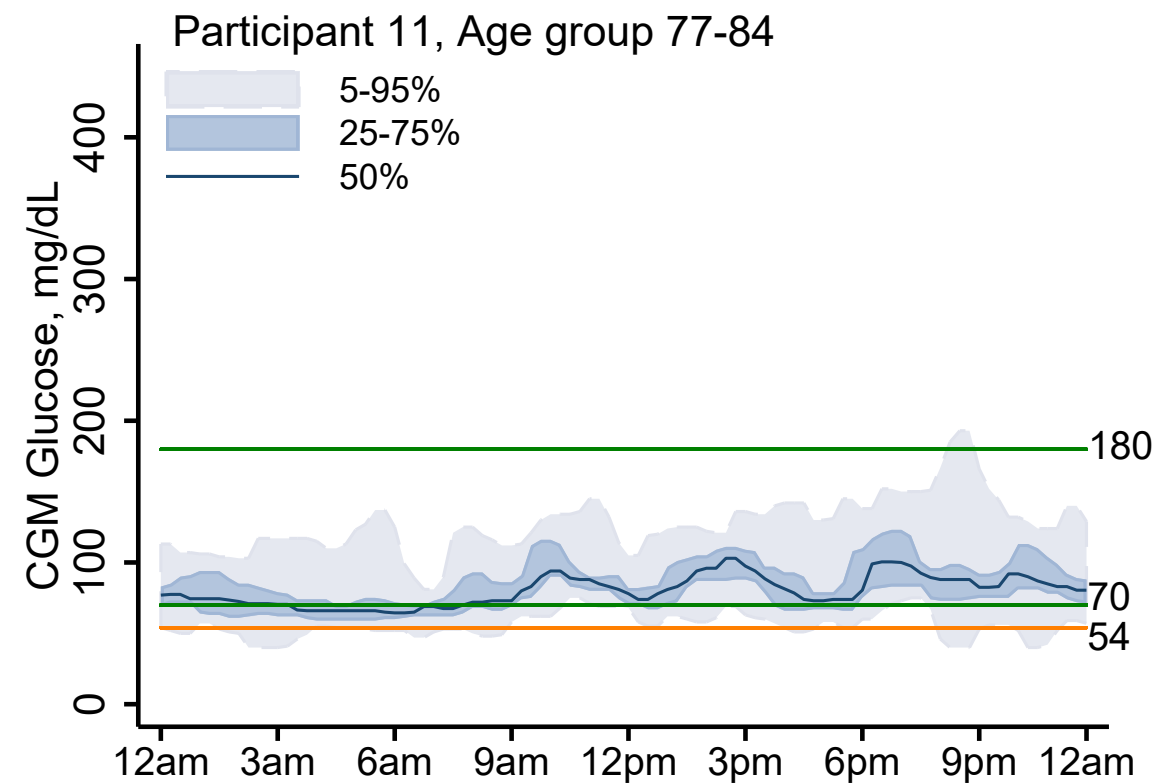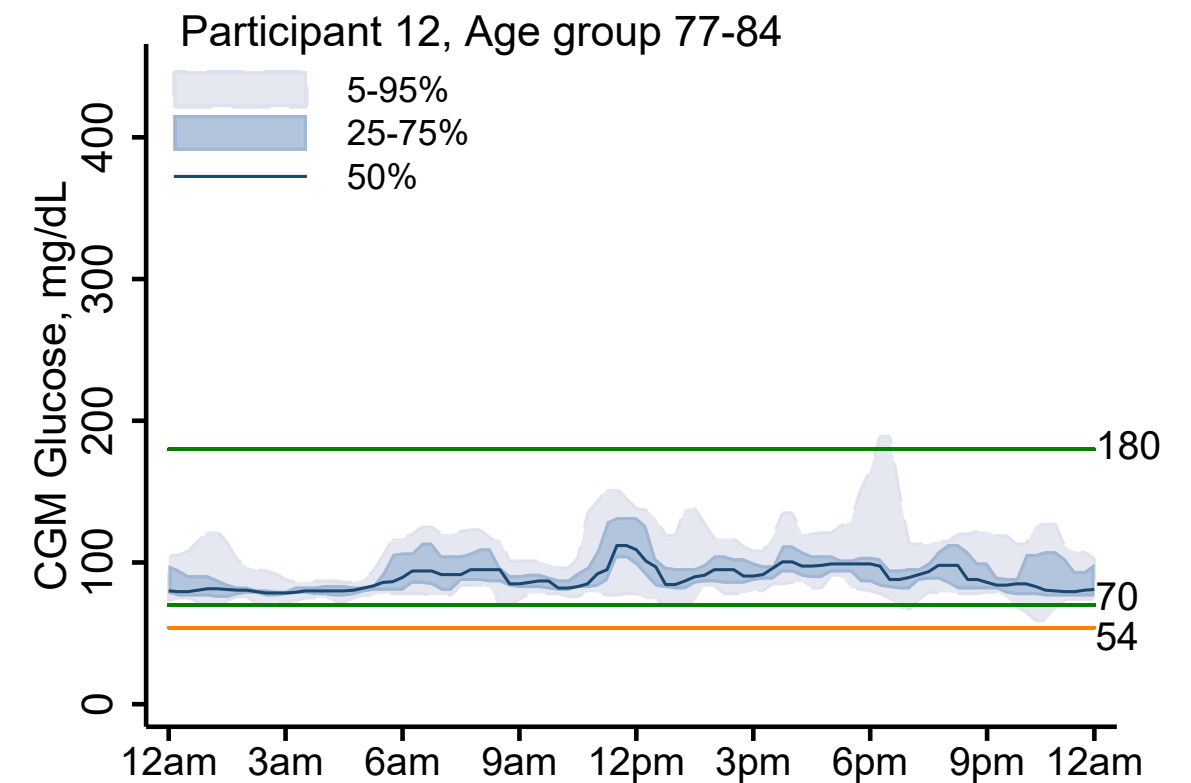

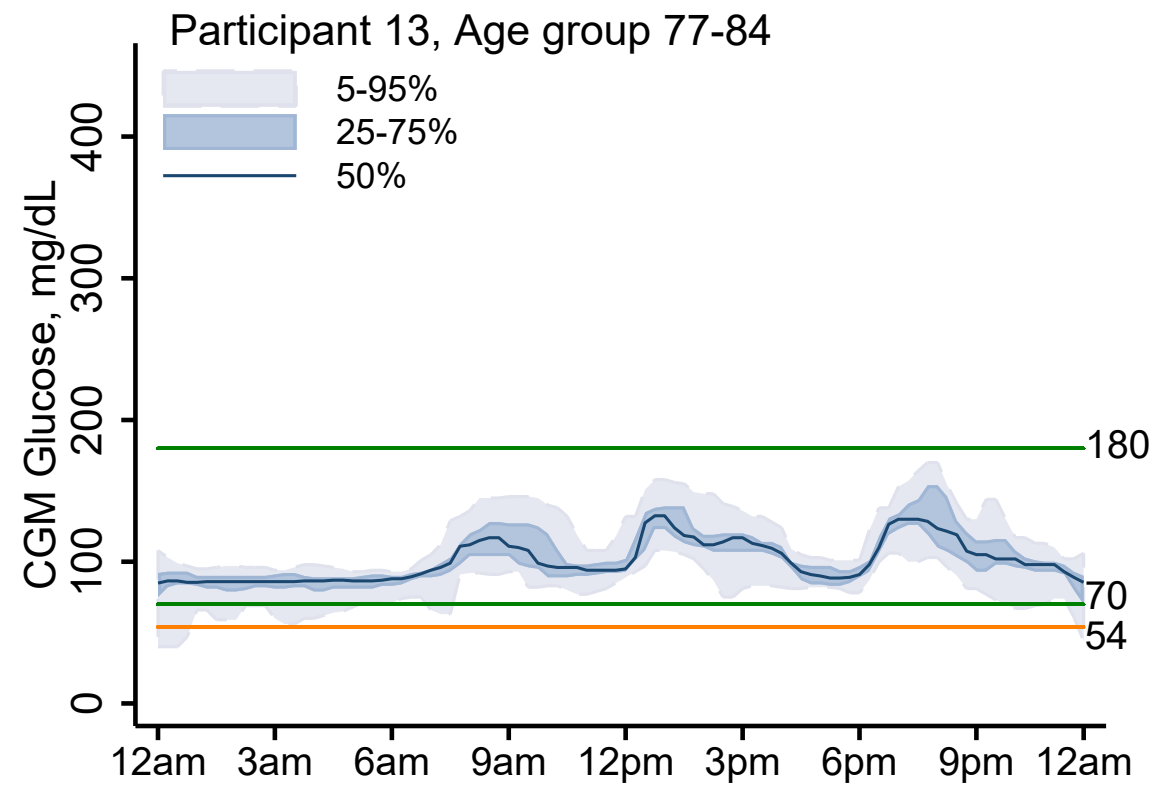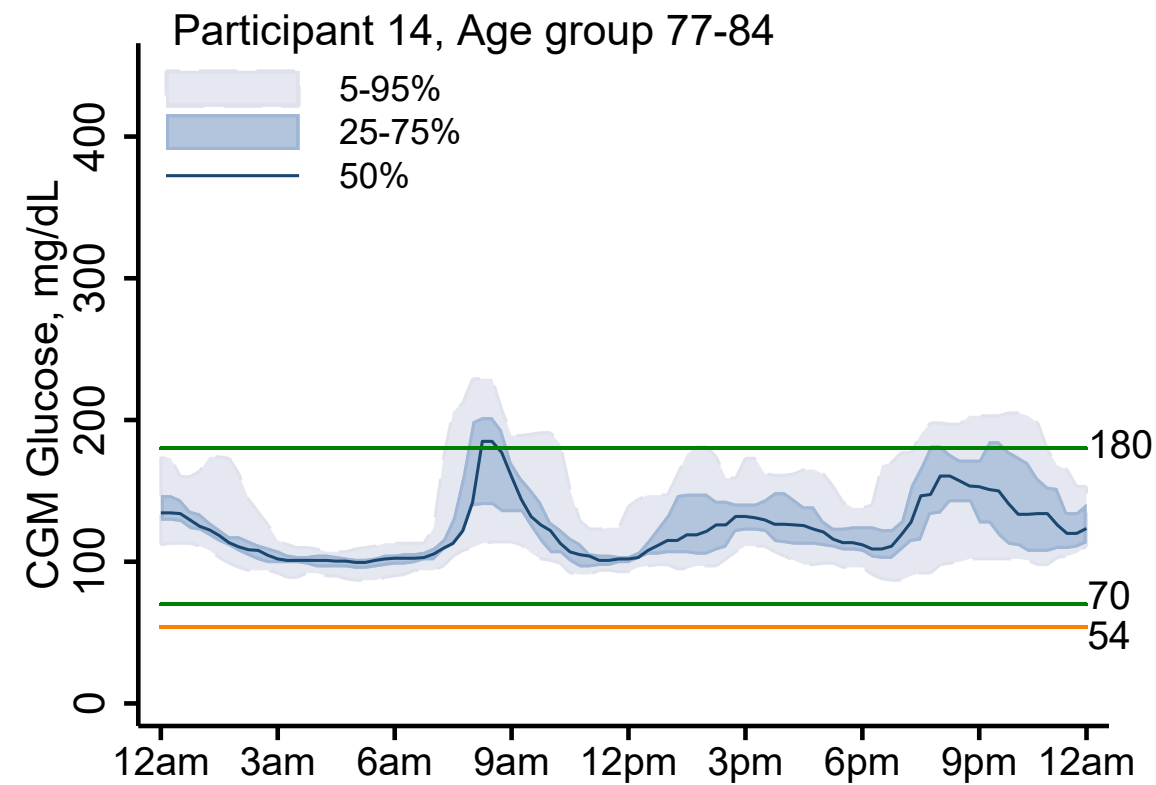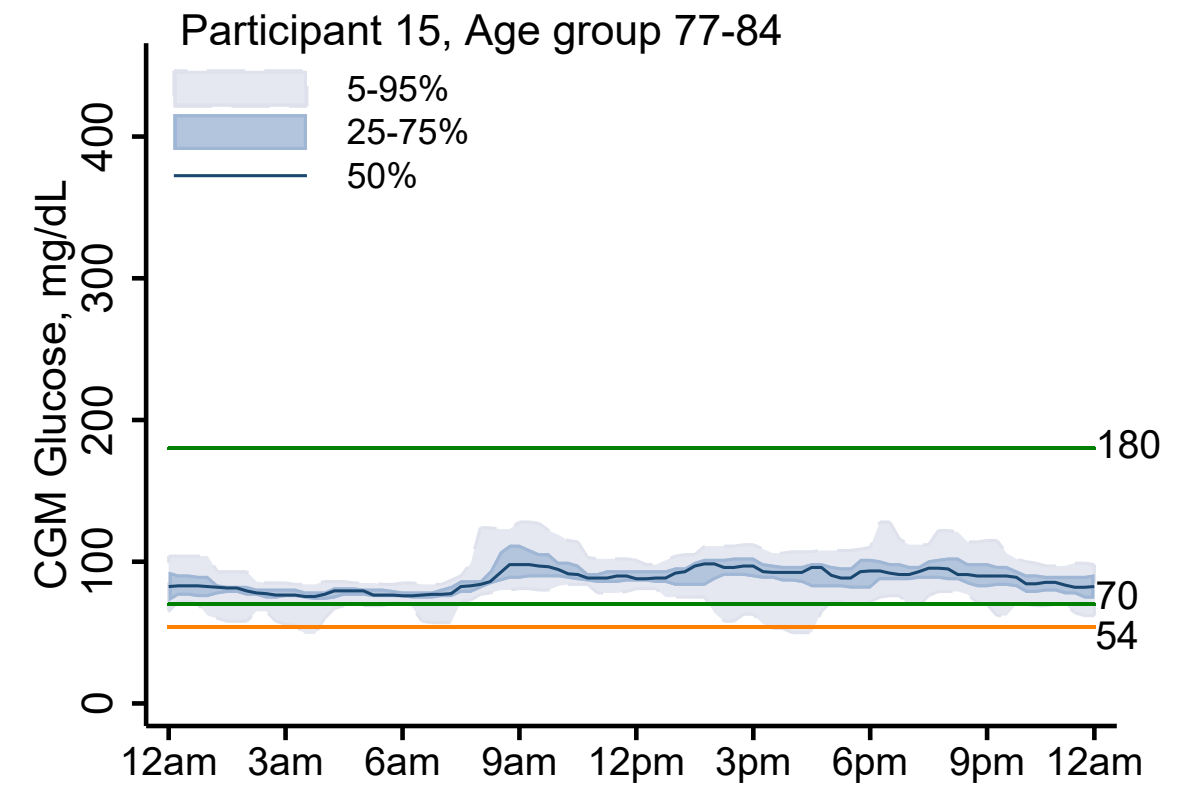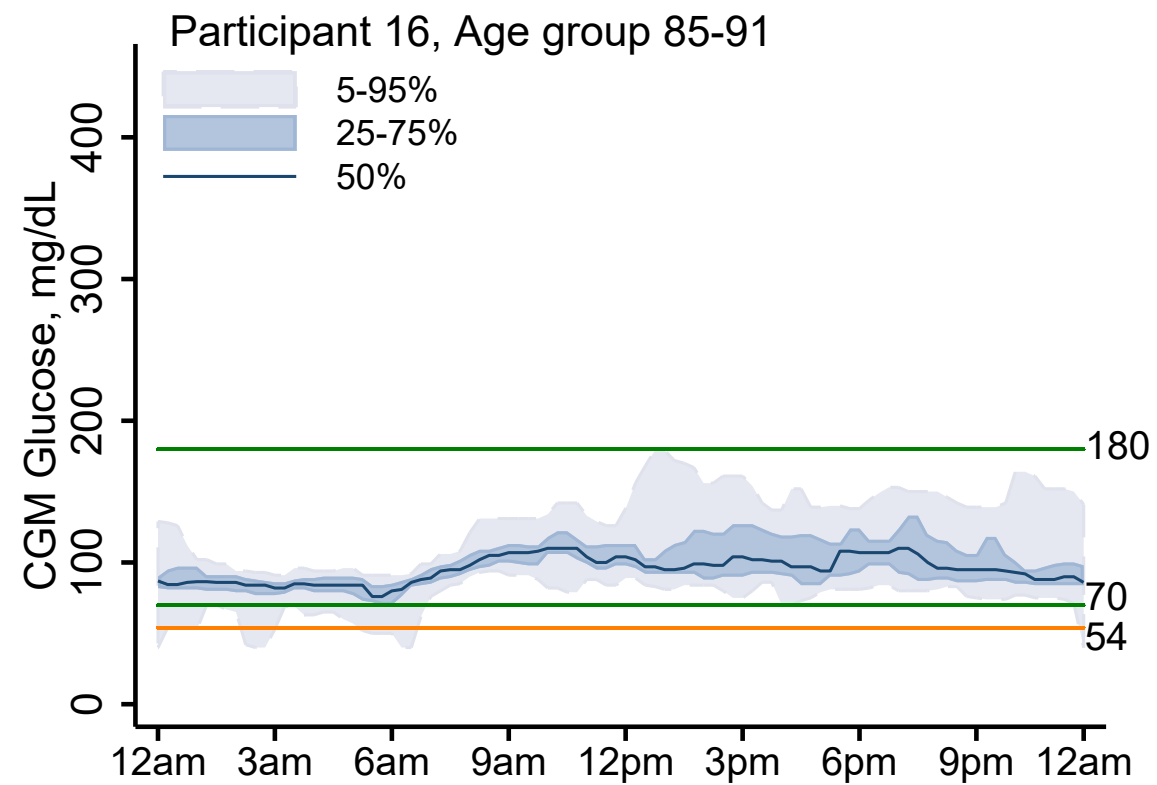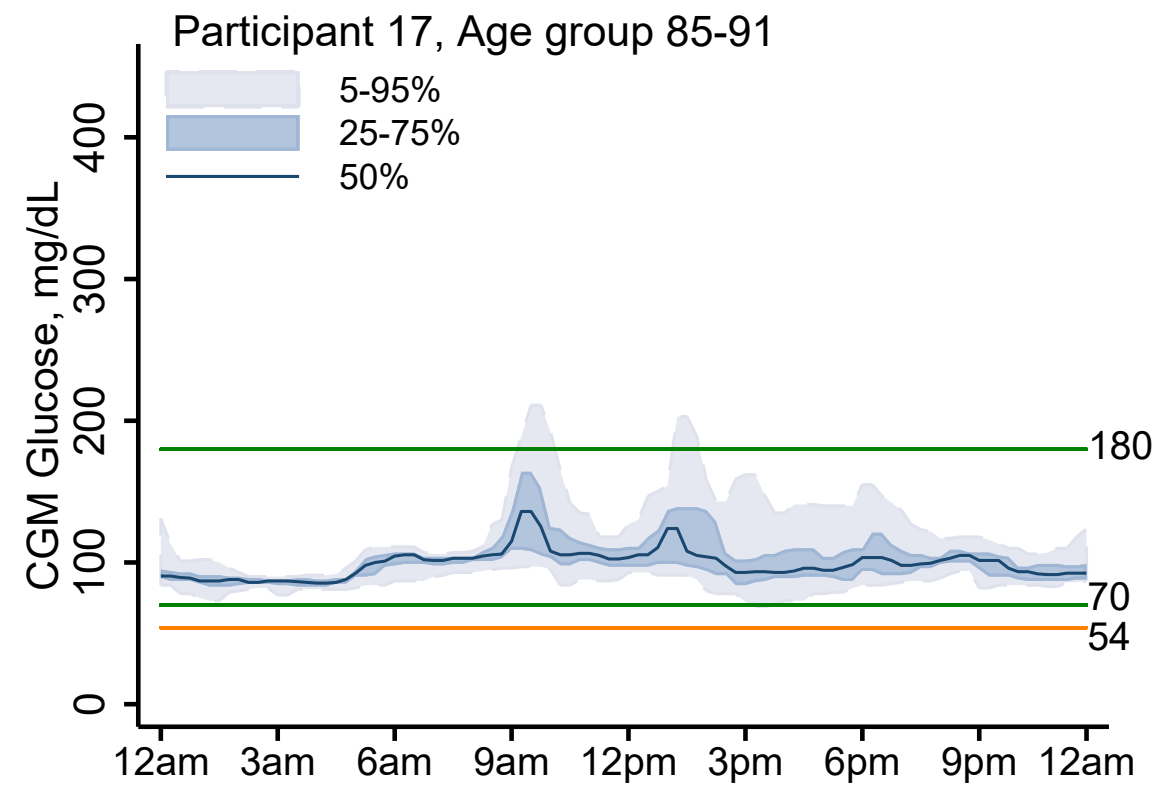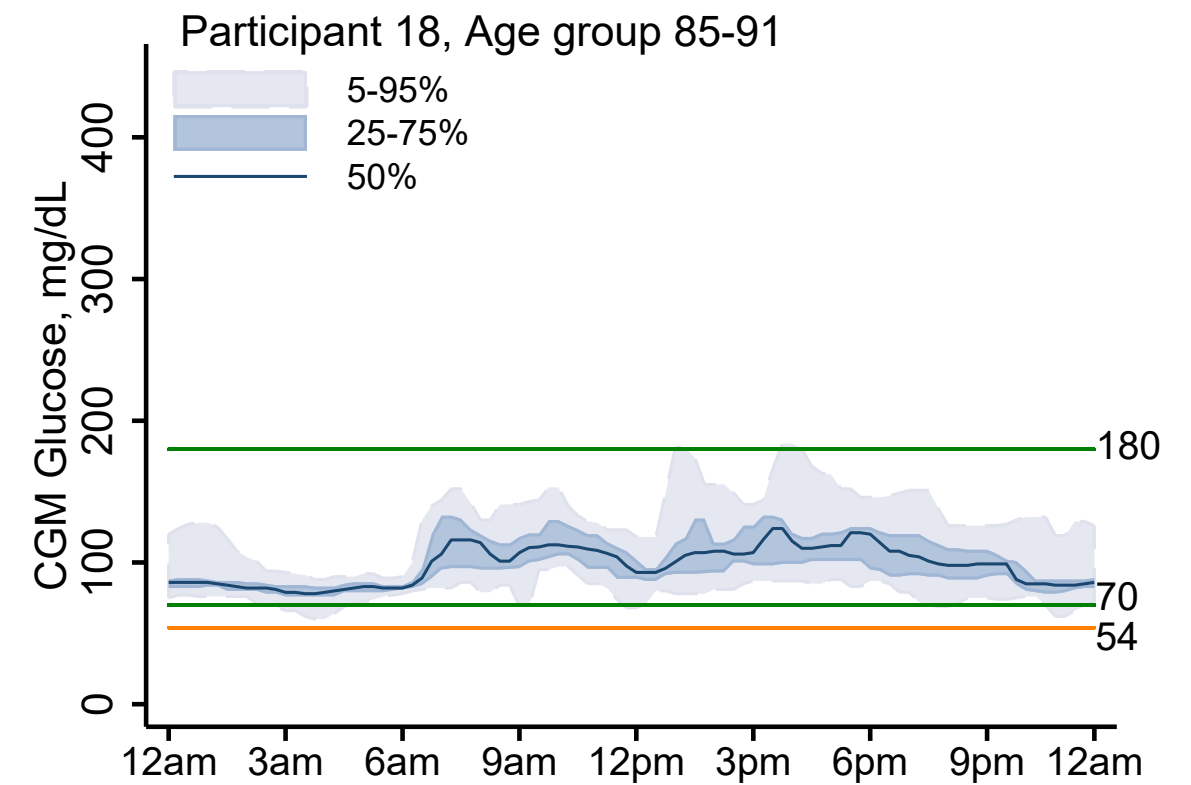

Participant 19, Age group 85-91

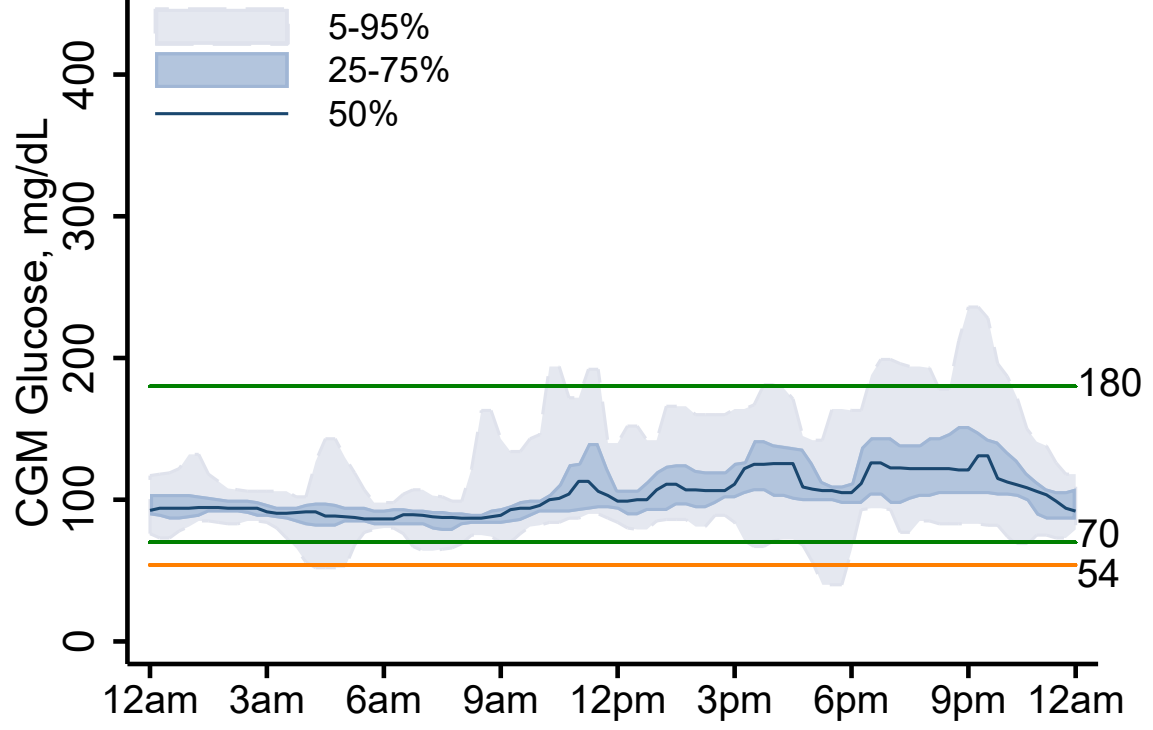

Supplement: Supp_FigS1.pdf [file Supp_FigS1.pdf]
