# Supplementary material
Source: PubMed Central journal article supplement (PMC8819510)

**Supplemental Figure 2. Ambulatory Glucose Profiles in Pilot Study Participants with Diagnosed Type 2 Diabetes**

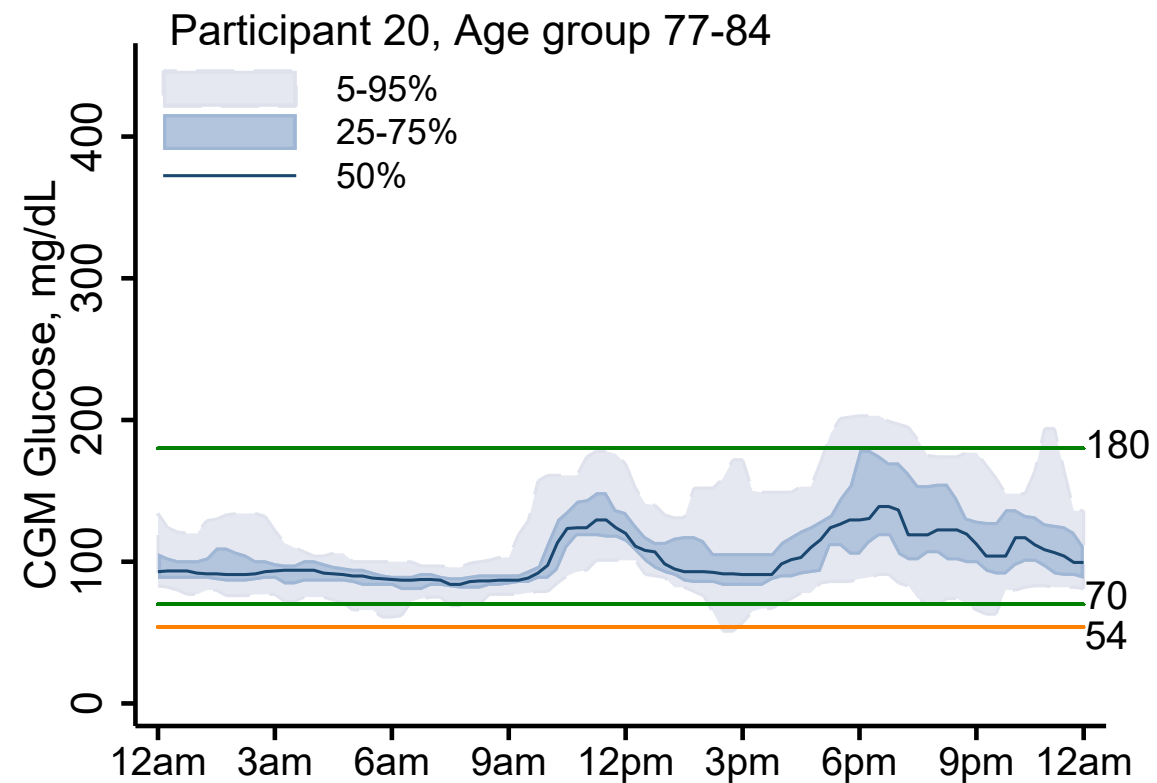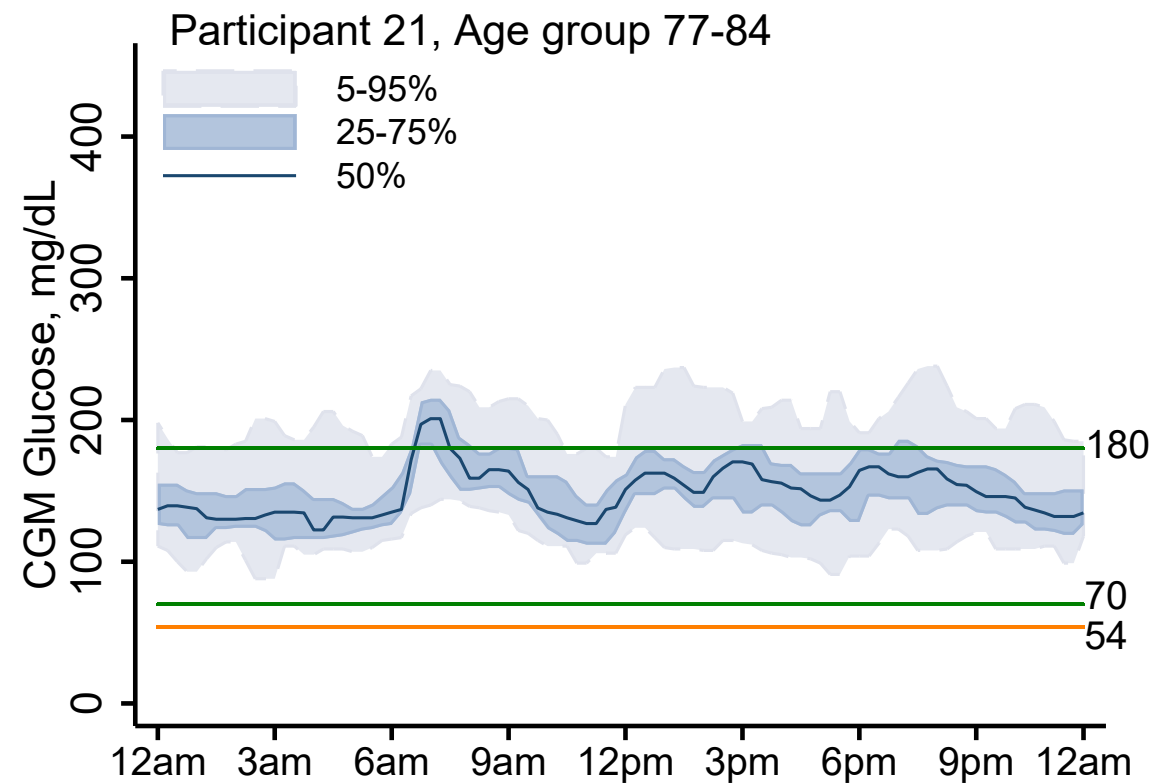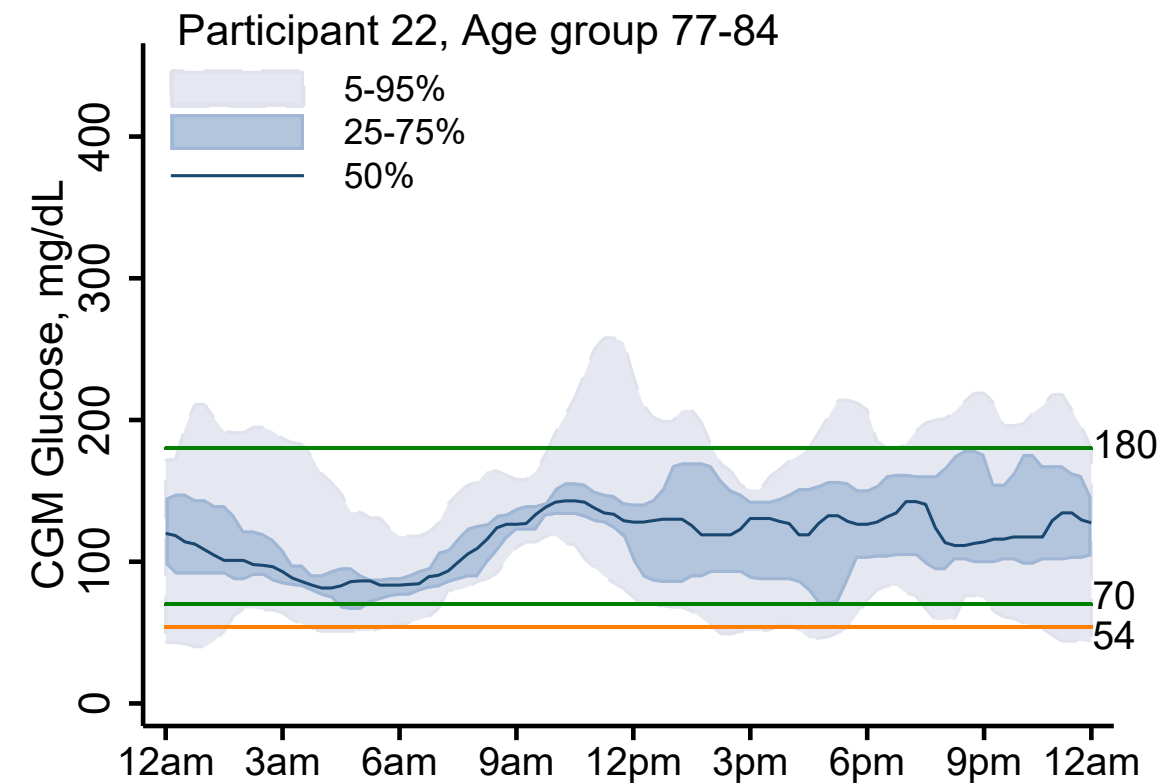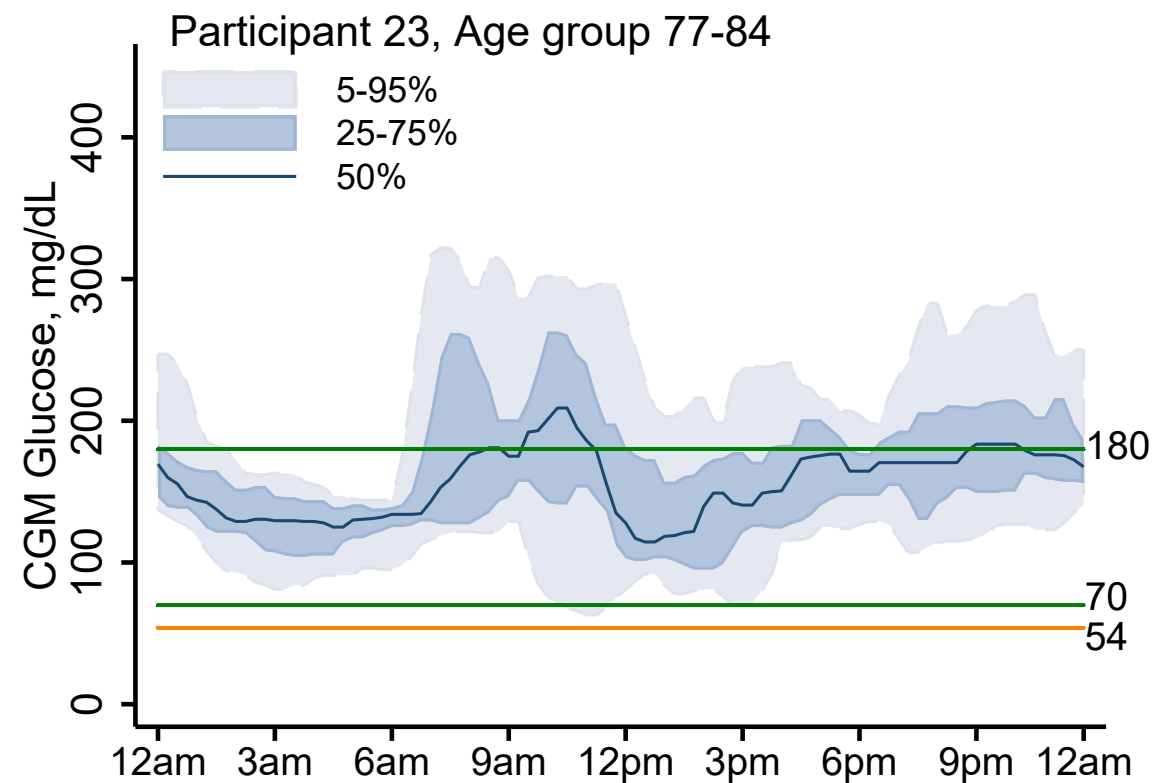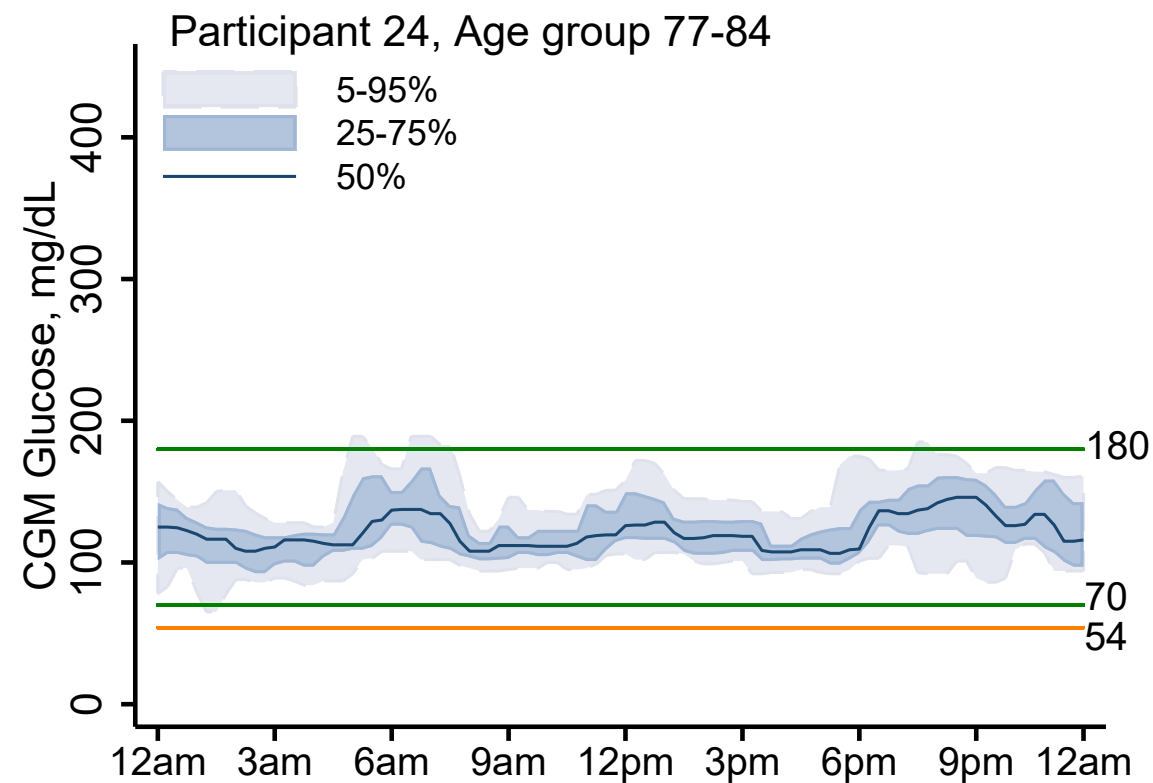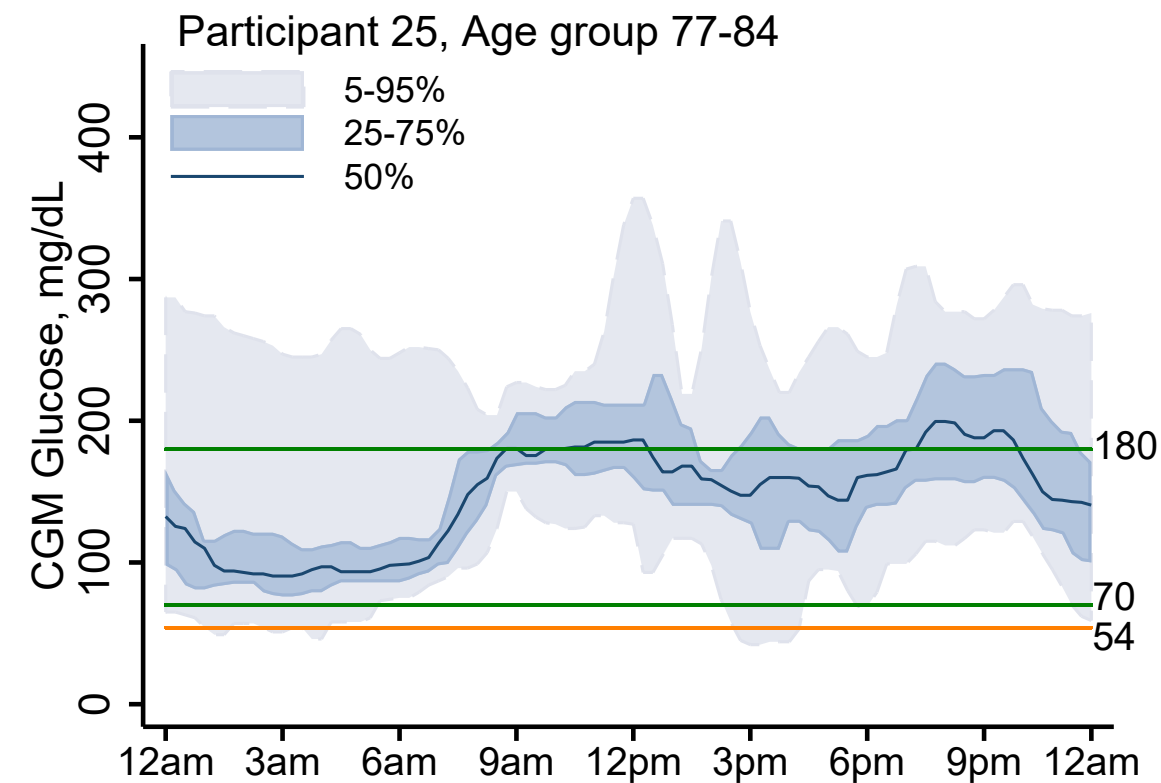

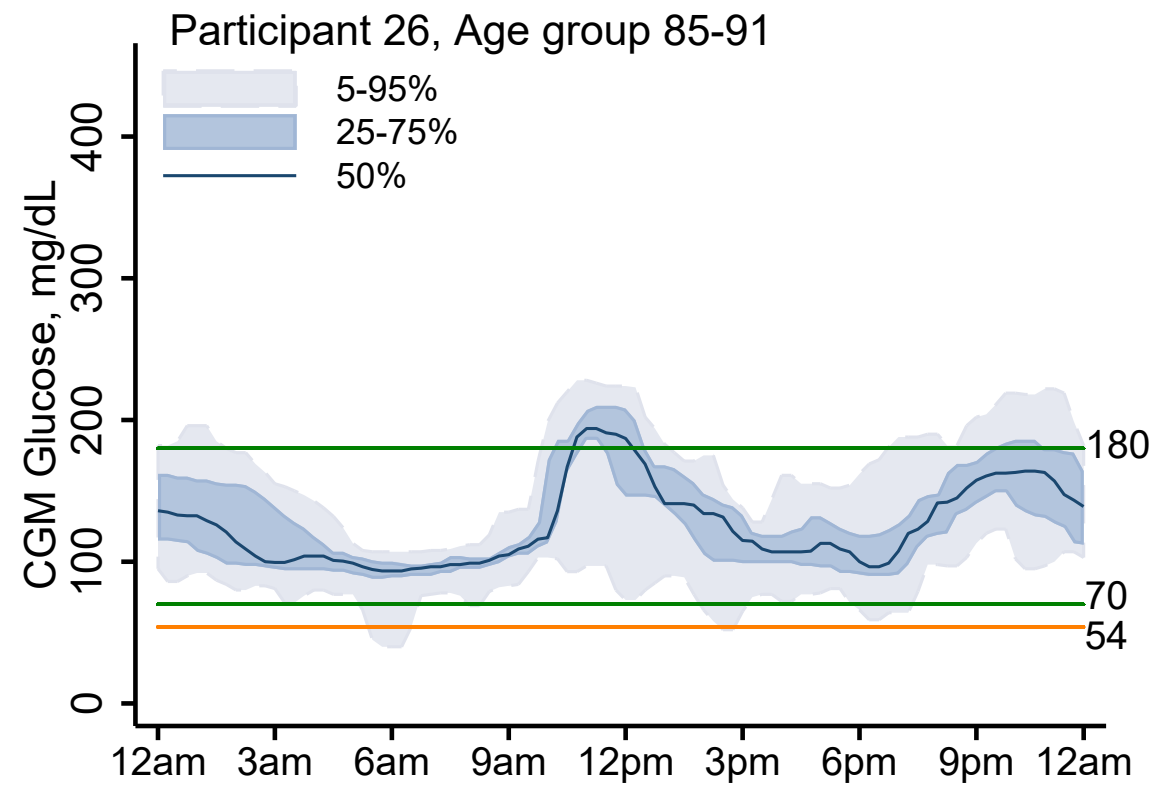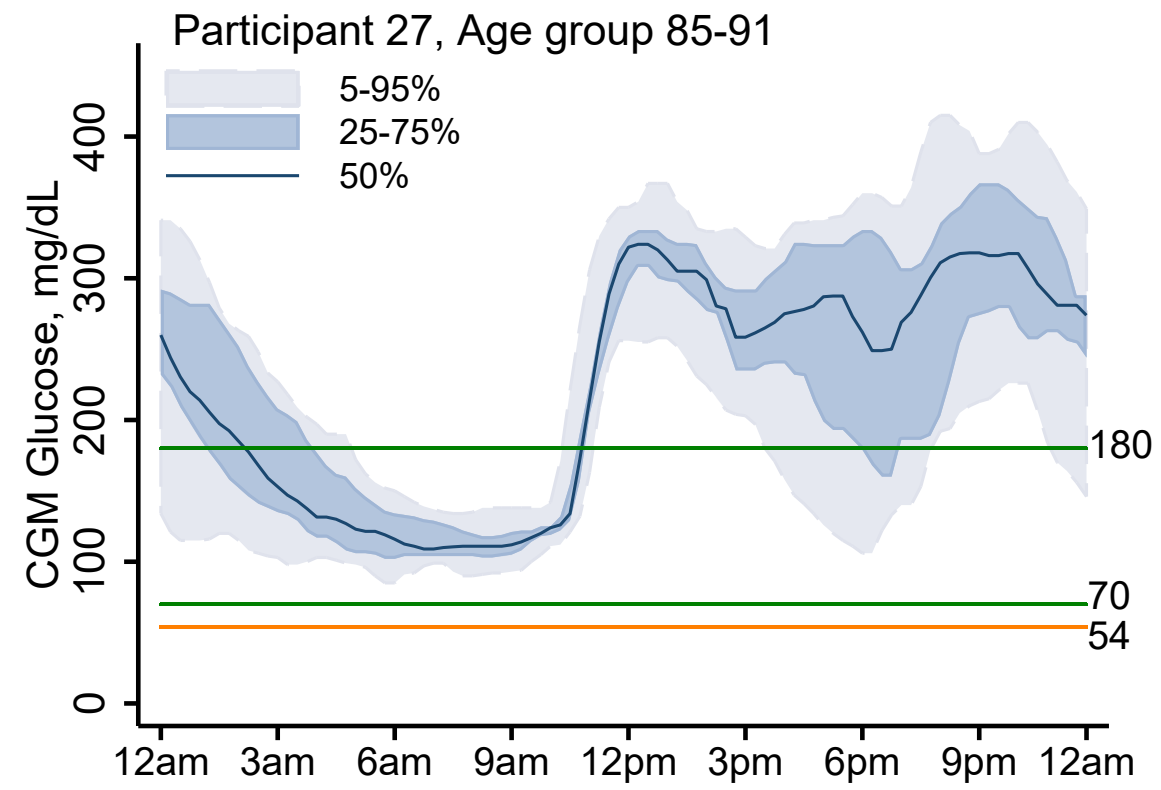

Supplement: Supp_FigS2.pdf [file Supp_FigS2.pdf]
