# Supplementary material
Source: PubMed Central journal article supplement (PMC8819510)
Supplement: Supp_TableS1.pdf [file Supp_TableS1.pdf]

**Supplemental Table 1. Continuous Glucose Monitoring Parameters, Based Only on Measurements Following the 24-Hour Warm Up Period**

|                                                              | <b>No Diabetes<br/>(N = 19)</b> | <b>Diagnosed<br/>Diabetes<br/>(N = 8)</b> |
|--------------------------------------------------------------|---------------------------------|-------------------------------------------|
| <b><u>Continuous glucose monitoring (CGM) parameters</u></b> |                                 |                                           |
| Glucose, mean (SD)                                           | 99.9 (10.0)                     | 146.0 (37.8)                              |
| SD, mean (p25, p75)                                          | 19.4 (18.0, 21.7)               | 37.6 (27.9, 53.4)                         |
| CV, mean (SD)                                                | 19% (3.4%)                      | 29% (7.6%)                                |
| IQR, median (p25, p75)                                       | 24.5 (21.3, 27.0)               | 54.6 (36.8, 71.0)                         |
| % of time glucose $\geq 200$ mg/dL, median (p25, p75)        | 0                               | 6.1 (1.9, 19.9)                           |
| % of time glucose $\geq 180$ mg/dL, median (p25, p75)        | 0.2 (0.0, 0.6)                  | 14.1 (4.9, 30.2)                          |
| % of time glucose $\geq 140$ mg/dL, median (p25, p75)        | 4.9 (1.8, 8.5)                  | 45.3 (24.5, 61.1)                         |
| % of time glucose 70-180 mg/dL, median (p25, p75)            | 98.1 (94.6, 99.4)               | 84.0 (67.7, 92.9)                         |
| % of time glucose 70-140 mg/dL, median (p25, p75)            | 93.1 (87.7, 95.4)               | 53.2 (39.3, 72.2)                         |
| % of time glucose $< 70$ mg/dL, median (p25, p75)            | 1.8 (0.2, 2.7)                  | 0.7 (0.1, 2.9)                            |
| % of time glucose $< 54$ mg/dL, median (p25, p75)            | 0.0 (0.0, 0.6)                  | 0.0 (0.0, 0.7)                            |
| MAGE, median (p25, p75)                                      | 31.4 (24.3, 39.0)               | 71.4 (44.6, 93.4)                         |
| MODD, median (p25, p75)                                      | 15.6 (13.5, 18.4)               | 35.0 (23.4, 49.7)                         |
| <b><u>Hypoglycemic events*</u></b>                           |                                 |                                           |
| # of participants with hypoglycemic events, n (%)            |                                 |                                           |
| Level 1: glucose $< 70$ mg/dL                                | 14 (74%)                        | 6 (75%)                                   |
| Level 2: glucose $< 54$ mg/dL                                | 7 (37%)                         | 3 (38%)                                   |
| # of hypoglycemic events, median (min, max)                  |                                 |                                           |
| Level 1: glucose $< 70$ mg/dL                                | 3 (0, 40)                       | 2 (0, 12)                                 |
| Level 2: glucose $< 54$ mg/dL                                | 0 (0, 9)                        | 0 (0, 5)                                  |

SD, standard deviation; IQR, inter-quartile range; CV, coefficient of variation; MAGE, mean amplitude of glycemic excursion; MODD, mean of daily difference

\* Hypoglycemia Level 1: glucose  $< 70$  mg/dL for more than 15 minutes (at least two consecutive readings). Hypoglycemia Level 2: glucose  $< 54$  mg/dL for more than 15 minutes (at least two consecutive readings).
